# Supplementary material
Source: PubMed Central journal article supplement (PMC9396472)
Supplement: jamaneurol-e222442-s002.pdf [file jamaneurol-e222442-s002.pdf]

\*First name, last name, and suffix (if applicable) are required and will appear in PubMed.

| <b>*Group Name(s): Alzheimer's Disease Neuroimaging Initiative, the Harvard Aging Brain Study, and the Presymptomatic Evaluation of Experimental or Novel Treatments for Alzheimer Disease Research Group</b> |                   |                              |                  |             |                                          |                                                         |                                                                                            |
|---------------------------------------------------------------------------------------------------------------------------------------------------------------------------------------------------------------|-------------------|------------------------------|------------------|-------------|------------------------------------------|---------------------------------------------------------|--------------------------------------------------------------------------------------------|
| <b>*First Name and Middle Initial(s)</b>                                                                                                                                                                      | <b>*Last Name</b> | <b>*Suffix (eg, Jr, III)</b> | Academic Degrees | Institution | Location (city, state/province, country) | Role or Contribution, eg, chair, principal investigator | Group (if more than 1 Group listed in the byline) and/or Subgroup (eg, Steering Committee) |
| Angela                                                                                                                                                                                                        | Tam               |                              |                  |             |                                          |                                                         | PREVENT-AD                                                                                 |
| Anne                                                                                                                                                                                                          | Labonte           |                              |                  |             |                                          |                                                         | PREVENT-AD                                                                                 |
| Alexa                                                                                                                                                                                                         | Pichet Binette    |                              |                  |             |                                          |                                                         | PREVENT-AD                                                                                 |
| Anne-Marie                                                                                                                                                                                                    | Faubert           | Jr                           |                  |             |                                          |                                                         | PREVENT-AD                                                                                 |
| Axel                                                                                                                                                                                                          | Mathieu           |                              |                  |             |                                          |                                                         | PREVENT-AD                                                                                 |
| Cecile                                                                                                                                                                                                        | Madjar            |                              |                  |             |                                          |                                                         | PREVENT-AD                                                                                 |
| Charles Edouard                                                                                                                                                                                               | Carrier           |                              |                  |             |                                          |                                                         | PREVENT-AD                                                                                 |
| Christian                                                                                                                                                                                                     | Dansereau         |                              |                  |             |                                          |                                                         | PREVENT-AD                                                                                 |
| Christina                                                                                                                                                                                                     | Kazazian          |                              |                  |             |                                          |                                                         | PREVENT-AD                                                                                 |
| Claude                                                                                                                                                                                                        | Lepage            |                              |                  |             |                                          |                                                         | PREVENT-AD                                                                                 |
| Cynthia                                                                                                                                                                                                       | Picard            |                              |                  |             |                                          |                                                         | PREVENT-AD                                                                                 |
| David                                                                                                                                                                                                         | Maillet           |                              |                  |             |                                          |                                                         | PREVENT-AD                                                                                 |
| Diane                                                                                                                                                                                                         | Michaud           |                              |                  |             |                                          |                                                         | PREVENT-AD                                                                                 |
| Doris                                                                                                                                                                                                         | Couture           |                              |                  |             |                                          |                                                         | PREVENT-AD                                                                                 |
| Doris                                                                                                                                                                                                         | Dea               |                              |                  |             |                                          |                                                         | PREVENT-AD                                                                                 |
| Claudio                                                                                                                                                                                                       | Cuello            |                              |                  |             |                                          |                                                         | PREVENT-AD                                                                                 |
| Alan                                                                                                                                                                                                          | Barkun            |                              |                  |             |                                          |                                                         | PREVENT-AD                                                                                 |
| Alan                                                                                                                                                                                                          | Evans             |                              |                  |             |                                          |                                                         | PREVENT-AD                                                                                 |
| Blandine                                                                                                                                                                                                      | Courcot           |                              |                  |             |                                          |                                                         | PREVENT-AD                                                                                 |
| Christine                                                                                                                                                                                                     | Tardif            |                              |                  |             |                                          |                                                         | PREVENT-AD                                                                                 |
| Clement                                                                                                                                                                                                       | Debacker          |                              |                  |             |                                          |                                                         | PREVENT-AD                                                                                 |
| Clifford                                                                                                                                                                                                      | Jack              |                              |                  |             |                                          |                                                         | PREVENT-AD                                                                                 |
| David                                                                                                                                                                                                         | Fontaine          |                              |                  |             |                                          |                                                         | PREVENT-AD                                                                                 |
| David                                                                                                                                                                                                         | Knopman           |                              |                  |             |                                          |                                                         | PREVENT-AD                                                                                 |
| Gerhard                                                                                                                                                                                                       | Multhaup          |                              |                  |             |                                          |                                                         | PREVENT-AD                                                                                 |
| Jamie                                                                                                                                                                                                         | Near              |                              |                  |             |                                          |                                                         | PREVENT-AD                                                                                 |
| Jeannie-Marie                                                                                                                                                                                                 | Leoutsakos        |                              |                  |             |                                          |                                                         | PREVENT-AD                                                                                 |
| Jean-Robert                                                                                                                                                                                                   | Maltais           |                              |                  |             |                                          |                                                         | PREVENT-AD                                                                                 |

## Supplemental Online Content: Nonauthor Collaborators

\*First name, last name, and suffix (if applicable) are required and will appear in PubMed.

| *First Name and Middle Initial(s) | *Last Name       | *Suffix (eg, Jr, III) | Academic Degrees | Institution | Location (city, state/province, country) | Role or Contribution, eg, chair, principal investigator | Group (if more than 1 Group listed in the byline) and/or Subgroup (eg, Steering Committee) |
|-----------------------------------|------------------|-----------------------|------------------|-------------|------------------------------------------|---------------------------------------------------------|--------------------------------------------------------------------------------------------|
| Jason                             | Brandt           |                       |                  |             |                                          |                                                         | PREVENT-AD                                                                                 |
| Jens                              | Pruessner        |                       |                  |             |                                          |                                                         | PREVENT-AD                                                                                 |
| John                              | Morris           |                       |                  |             |                                          |                                                         | PREVENT-AD                                                                                 |
| John                              | Breitner         |                       |                  |             |                                          |                                                         | PREVENT-AD                                                                                 |
| Judes                             | Poirier          |                       |                  |             |                                          |                                                         | PREVENT-AD                                                                                 |
| Laksanun                          | Cheewakriengkrai |                       |                  |             |                                          |                                                         | PREVENT-AD                                                                                 |
| Lisa-Marie                        | Münter           |                       |                  |             |                                          |                                                         | PREVENT-AD                                                                                 |
| Louis                             | Collins          |                       |                  |             |                                          |                                                         | PREVENT-AD                                                                                 |
| Mallar                            | Chakravarty      |                       |                  |             |                                          |                                                         | PREVENT-AD                                                                                 |
| Mark                              | Sager            |                       |                  |             |                                          |                                                         | PREVENT-AD                                                                                 |
| Marina                            | Dauar-Tedeschi   |                       |                  |             |                                          |                                                         | PREVENT-AD                                                                                 |
| Mark                              | Eisenberg        |                       |                  |             |                                          |                                                         | PREVENT-AD                                                                                 |
| Natasha                           | Rajah            |                       |                  |             |                                          |                                                         | PREVENT-AD                                                                                 |
| Paul                              | Aisen            |                       |                  |             |                                          |                                                         | PREVENT-AD                                                                                 |
| Paule-Joanne                      | Toussaint        |                       |                  |             |                                          |                                                         | PREVENT-AD                                                                                 |
| Pedro                             | Rosa-Neto        |                       |                  |             |                                          |                                                         | PREVENT-AD                                                                                 |
| Pierre                            | Bellec           |                       |                  |             |                                          |                                                         | PREVENT-AD                                                                                 |
| Penelope                          | Kostopoulos      |                       |                  |             |                                          |                                                         | PREVENT-AD                                                                                 |
| Pierre                            | Etienne          |                       |                  |             |                                          |                                                         | PREVENT-AD                                                                                 |
| Pierre                            | Tariot           |                       |                  |             |                                          |                                                         | PREVENT-AD                                                                                 |
| Pierre                            | Orban            |                       |                  |             |                                          |                                                         | PREVENT-AD                                                                                 |
| Reisa                             | Sperling         |                       |                  |             |                                          |                                                         | PREVENT-AD                                                                                 |
| Rick                              | Hoge             |                       |                  |             |                                          |                                                         | PREVENT-AD                                                                                 |
| Ronald                            | Thomas           |                       |                  |             |                                          |                                                         | PREVENT-AD                                                                                 |
| Serge                             | Gauthier         |                       |                  |             |                                          |                                                         | PREVENT-AD                                                                                 |
| Suzanne                           | Craft            |                       |                  |             |                                          |                                                         | PREVENT-AD                                                                                 |
| Sylvia                            | Villeneuve       |                       |                  |             |                                          |                                                         | PREVENT-AD                                                                                 |
| Thomas                            | Montine          |                       |                  |             |                                          |                                                         | PREVENT-AD                                                                                 |
| Vasavan                           | Nair             |                       |                  |             |                                          |                                                         | PREVENT-AD                                                                                 |
| Veronique                         | Bohbot           |                       |                  |             |                                          |                                                         | PREVENT-AD                                                                                 |
| Vinod                             | Venugopalan      |                       |                  |             |                                          |                                                         | PREVENT-AD                                                                                 |

## Supplemental Online Content: Nonauthor Collaborators

\*First name, last name, and suffix (if applicable) are required and will appear in PubMed.

| *First Name and Middle Initial(s) | *Last Name       | *Suffix (eg, Jr, III) | Academic Degrees | Institution | Location (city, state/province, country) | Role or Contribution, eg, chair, principal investigator | Group (if more than 1 Group listed in the byline) and/or Subgroup (eg, Steering Committee) |
|-----------------------------------|------------------|-----------------------|------------------|-------------|------------------------------------------|---------------------------------------------------------|--------------------------------------------------------------------------------------------|
| Vladimir                          | Fonov            |                       |                  |             |                                          |                                                         | PREVENT-AD                                                                                 |
| Yasser                            | Ituria-Medina    |                       |                  |             |                                          |                                                         | PREVENT-AD                                                                                 |
| Zaven                             | Khachaturian     |                       |                  |             |                                          |                                                         | PREVENT-AD                                                                                 |
| Eduard                            | Teigner          |                       |                  |             |                                          |                                                         | PREVENT-AD                                                                                 |
| Elena                             | Anthal           |                       |                  |             |                                          |                                                         | PREVENT-AD                                                                                 |
| Elsa                              | Yu               |                       |                  |             |                                          |                                                         | PREVENT-AD                                                                                 |
| Fabiola                           | Ferdinand        |                       |                  |             |                                          |                                                         | PREVENT-AD                                                                                 |
| Galina                            | Pogossova        |                       |                  |             |                                          |                                                         | PREVENT-AD                                                                                 |
| Ginette                           | Mayrand          |                       |                  |             |                                          |                                                         | PREVENT-AD                                                                                 |
| Guerda                            | Duclair          |                       |                  |             |                                          |                                                         | PREVENT-AD                                                                                 |
| Guylaine                          | Gagne            |                       |                  |             |                                          |                                                         | PREVENT-AD                                                                                 |
| Holly                             | Newbold-Fox      |                       |                  |             |                                          |                                                         | PREVENT-AD                                                                                 |
| Illana                            | Leppert          |                       |                  |             |                                          |                                                         | PREVENT-AD                                                                                 |
| Isabelle                          | Vallee           |                       |                  |             |                                          |                                                         | PREVENT-AD                                                                                 |
| Jacob                             | Vogel            |                       |                  |             |                                          |                                                         | PREVENT-AD                                                                                 |
| Jennifer                          | Tremblay-Mercier |                       |                  |             |                                          |                                                         | PREVENT-AD                                                                                 |
| Joanne                            | Frenette         |                       |                  |             |                                          |                                                         | PREVENT-AD                                                                                 |
| Josee                             | Frappier         |                       |                  |             |                                          |                                                         | PREVENT-AD                                                                                 |
| Justin                            | Kat              |                       |                  |             |                                          |                                                         | PREVENT-AD                                                                                 |
| Justin                            | Miron            |                       |                  |             |                                          |                                                         | PREVENT-AD                                                                                 |
| Karen                             | Wan              |                       |                  |             |                                          |                                                         | PREVENT-AD                                                                                 |
| Laura                             | Mahar            |                       |                  |             |                                          |                                                         | PREVENT-AD                                                                                 |
| Leopoldina                        | Carmo            |                       |                  |             |                                          |                                                         | PREVENT-AD                                                                                 |
| Louise                            | Theroux          |                       |                  |             |                                          |                                                         | PREVENT-AD                                                                                 |
| Mahsa                             | Dadar            |                       |                  |             |                                          |                                                         | PREVENT-AD                                                                                 |
| Marianne                          | Dufour           |                       |                  |             |                                          |                                                         | PREVENT-AD                                                                                 |
| Marie-Elyse                       | Lafaille-Magnan  |                       |                  |             |                                          |                                                         | PREVENT-AD                                                                                 |
| Melissa                           | Appleby          |                       |                  |             |                                          |                                                         | PREVENT-AD                                                                                 |
| Melissa                           | Savard           |                       |                  |             |                                          |                                                         | PREVENT-AD                                                                                 |
| Miranda                           | Tuwaig           |                       |                  |             |                                          |                                                         | PREVENT-AD                                                                                 |
| Mirela                            | Petkova          |                       |                  |             |                                          |                                                         | PREVENT-AD                                                                                 |

## Supplemental Online Content: Nonauthor Collaborators

\*First name, last name, and suffix (if applicable) are required and will appear in PubMed.

| *First Name and Middle Initial(s) | *Last Name      | *Suffix (eg, Jr, III) | Academic Degrees | Institution | Location (city, state/province, country) | Role or Contribution, eg, chair, principal investigator | Group (if more than 1 Group listed in the byline) and/or Subgroup (eg, Steering Committee) |
|-----------------------------------|-----------------|-----------------------|------------------|-------------|------------------------------------------|---------------------------------------------------------|--------------------------------------------------------------------------------------------|
| Pierre                            | Rioux           |                       |                  |             |                                          |                                                         | PREVENT-AD                                                                                 |
| Pierre-François                   | Meyer           |                       |                  |             |                                          |                                                         | PREVENT-AD                                                                                 |
| Rana                              | El-Khoury       |                       |                  |             |                                          |                                                         | PREVENT-AD                                                                                 |
| Renee                             | Gordon          |                       |                  |             |                                          |                                                         | PREVENT-AD                                                                                 |
| Renuka                            | Giles           |                       |                  |             |                                          |                                                         | PREVENT-AD                                                                                 |
| Samir                             | Das             |                       |                  |             |                                          |                                                         | PREVENT-AD                                                                                 |
| Seqian                            | Wang            |                       |                  |             |                                          |                                                         | PREVENT-AD                                                                                 |
| Shirin                            | Tabrizi         |                       |                  |             |                                          |                                                         | PREVENT-AD                                                                                 |
| Sulantha                          | Mathotaarachchi |                       |                  |             |                                          |                                                         | PREVENT-AD                                                                                 |
| Sylvie                            | Dubuc           |                       |                  |             |                                          |                                                         | PREVENT-AD                                                                                 |
| Tanya                             | Lee             |                       |                  |             |                                          |                                                         | PREVENT-AD                                                                                 |
| Thomas                            | Beaudry         |                       |                  |             |                                          |                                                         | PREVENT-AD                                                                                 |
| Valerie                           | Gervais         |                       |                  |             |                                          |                                                         | PREVENT-AD                                                                                 |
| Veronique                         | Page            |                       |                  |             |                                          |                                                         | PREVENT-AD                                                                                 |
| Julie                             | Gonneaud        |                       |                  |             |                                          |                                                         | PREVENT-AD                                                                                 |
| G lebru                           | Ayranci         |                       |                  |             |                                          |                                                         | PREVENT-AD                                                                                 |
| Tharick                           | Pascoal         |                       |                  |             |                                          |                                                         | PREVENT-AD                                                                                 |
| Rene                              | Desautels       |                       |                  |             |                                          |                                                         | PREVENT-AD                                                                                 |
| Fatiha                            | Benbouhoud      |                       |                  |             |                                          |                                                         | PREVENT-AD                                                                                 |
| Eunice Farah                      | Saint-Fort      |                       |                  |             |                                          |                                                         | PREVENT-AD                                                                                 |
| Sander                            | Verfaillie      |                       |                  |             |                                          |                                                         | PREVENT-AD                                                                                 |
| Sarah                             | Farzin          |                       |                  |             |                                          |                                                         | PREVENT-AD                                                                                 |
| Alyssa                            | Salaciak        |                       |                  |             |                                          |                                                         | PREVENT-AD                                                                                 |
| Stephanie                         | Tullo           |                       |                  |             |                                          |                                                         | PREVENT-AD                                                                                 |
| Etienne                           | Vachon-Presseau |                       |                  |             |                                          |                                                         | PREVENT-AD                                                                                 |
| Leslie-Ann                        | Daoust          |                       |                  |             |                                          |                                                         | PREVENT-AD                                                                                 |
| Theresa                           | Kobe            |                       |                  |             |                                          |                                                         | PREVENT-AD                                                                                 |
| Nathan                            | Spreng          |                       |                  |             |                                          |                                                         | PREVENT-AD                                                                                 |
| Melissa                           | McSweeney       |                       |                  |             |                                          |                                                         | PREVENT-AD                                                                                 |
| Nathalie                          | Nilsson         |                       |                  |             |                                          |                                                         | PREVENT-AD                                                                                 |
| Morteza                           | Pishnamazi      |                       |                  |             |                                          |                                                         | PREVENT-AD                                                                                 |

## Supplemental Online Content: Nonauthor Collaborators

\*First name, last name, and suffix (if applicable) are required and will appear in PubMed.

| *First Name and Middle Initial(s) | *Last Name        | *Suffix (eg, Jr, III) | Academic Degrees | Institution | Location (city, state/province, country) | Role or Contribution, eg, chair, principal investigator | Group (if more than 1 Group listed in the byline) and/or Subgroup (eg, Steering Committee) |
|-----------------------------------|-------------------|-----------------------|------------------|-------------|------------------------------------------|---------------------------------------------------------|--------------------------------------------------------------------------------------------|
| Christophe                        | Bedetti           |                       |                  |             |                                          |                                                         | PREVENT-AD                                                                                 |
| Louise                            | Hudon             |                       |                  |             |                                          |                                                         | PREVENT-AD                                                                                 |
| Claudia                           | Greco             |                       |                  |             |                                          |                                                         | PREVENT-AD                                                                                 |
| Marianne                          | Chapleau          |                       |                  |             |                                          |                                                         | PREVENT-AD                                                                                 |
| Frederic                          | St-Onge           |                       |                  |             |                                          |                                                         | PREVENT-AD                                                                                 |
| Sophie                            | Boutin            |                       |                  |             |                                          |                                                         | PREVENT-AD                                                                                 |
| Maiya                             | Geddes            |                       |                  |             |                                          |                                                         | PREVENT-AD                                                                                 |
| Maiya                             | Geddes            |                       |                  |             |                                          |                                                         | PREVENT-AD                                                                                 |
| Maiya                             | Geddes            |                       |                  |             |                                          |                                                         | PREVENT-AD                                                                                 |
| Simon                             | Ducharme          |                       |                  |             |                                          |                                                         | PREVENT-AD                                                                                 |
| Gabriel                           | Jean              |                       |                  |             |                                          |                                                         | PREVENT-AD                                                                                 |
| Elisabeth                         | Sylvain           |                       |                  |             |                                          |                                                         | PREVENT-AD                                                                                 |
| Marie-Josée                       | Ã%olie            |                       |                  |             |                                          |                                                         | PREVENT-AD                                                                                 |
| Gloria                            | Leblond-Baccichet |                       |                  |             |                                          |                                                         | PREVENT-AD                                                                                 |
| Jean-Paul                         | Soucy             |                       |                  |             |                                          |                                                         | PREVENT-AD                                                                                 |
| Hazal                             | Ozlen             |                       |                  |             |                                          |                                                         | PREVENT-AD                                                                                 |
| Julie                             | Bailly            |                       |                  |             |                                          |                                                         | PREVENT-AD                                                                                 |
| Bery                              | Mohammediyan      |                       |                  |             |                                          |                                                         | PREVENT-AD                                                                                 |
| Yalin                             | Chen              |                       |                  |             |                                          |                                                         | PREVENT-AD                                                                                 |
| Jordana                           | Remz              |                       |                  |             |                                          |                                                         | PREVENT-AD                                                                                 |
| Jean-Paul                         | Soucy             |                       |                  |             |                                          |                                                         | PREVENT-AD                                                                                 |
| Michael W                         | Weiner            |                       |                  |             |                                          |                                                         | ADNI                                                                                       |
| Paul                              | Aisen             |                       |                  |             |                                          |                                                         | ADNI                                                                                       |
| Ronald                            | Peterson          |                       |                  |             |                                          |                                                         | ADNI                                                                                       |
| Clifford R.                       | Jack              | Jr                    |                  |             |                                          |                                                         | ADNI                                                                                       |
| William                           | Jagust            |                       |                  |             |                                          |                                                         | ADNI                                                                                       |
| John Q                            | Trojanowki        |                       |                  |             |                                          |                                                         | ADNI                                                                                       |
| Arthur W                          | Toga              |                       |                  |             |                                          |                                                         | ADNI                                                                                       |
| Laurel                            | Beckett           |                       |                  |             |                                          |                                                         | ADNI                                                                                       |
| Robert C                          | Green             |                       |                  |             |                                          |                                                         | ADNI                                                                                       |
| Andrew J                          | Saykin            |                       |                  |             |                                          |                                                         | ADNI                                                                                       |

## Supplemental Online Content: Nonauthor Collaborators

\*First name, last name, and suffix (if applicable) are required and will appear in PubMed.

| *First Name and Middle Initial(s) | *Last Name    | *Suffix (eg, Jr, III) | Academic Degrees | Institution | Location (city, state/province, country) | Role or Contribution, eg, chair, principal investigator | Group (if more than 1 Group listed in the byline) and/or Subgroup (eg, Steering Committee) |
|-----------------------------------|---------------|-----------------------|------------------|-------------|------------------------------------------|---------------------------------------------------------|--------------------------------------------------------------------------------------------|
| John C                            | Morris        |                       |                  |             |                                          |                                                         | ADNI                                                                                       |
| Richard J                         | Perrin        |                       |                  |             |                                          |                                                         | ADNI                                                                                       |
| Leslie M                          | Shaw          |                       |                  |             |                                          |                                                         | ADNI                                                                                       |
| Zaven                             | Khachaturian  |                       |                  |             |                                          |                                                         | ADNI                                                                                       |
| Maria                             | Carrillo      |                       |                  |             |                                          |                                                         | ADNI                                                                                       |
| William                           | Porter        |                       |                  |             |                                          |                                                         | ADNI                                                                                       |
| Lisa                              | Barnes        |                       |                  |             |                                          |                                                         | ADNI                                                                                       |
| Marie                             | Bernard       |                       |                  |             |                                          |                                                         | ADNI                                                                                       |
| Hector                            | Gonzalez      |                       |                  |             |                                          |                                                         | ADNI                                                                                       |
| Carole                            | Ho            |                       |                  |             |                                          |                                                         | ADNI                                                                                       |
| John K                            | Hsiao         |                       |                  |             |                                          |                                                         | ADNI                                                                                       |
| Jonathan                          | Jackson       |                       |                  |             |                                          |                                                         | ADNI                                                                                       |
| Eliezer                           | Masliah       |                       |                  |             |                                          |                                                         | ADNI                                                                                       |
| Donna                             | Masterman     |                       |                  |             |                                          |                                                         | ADNI                                                                                       |
| Ozioma                            | Okonkwo       |                       |                  |             |                                          |                                                         | ADNI                                                                                       |
| Laurie                            | Ryan          |                       |                  |             |                                          |                                                         | ADNI                                                                                       |
| Nina                              | Silverberg    |                       |                  |             |                                          |                                                         | ADNI                                                                                       |
| Adam                              | Fleisher      |                       |                  |             |                                          |                                                         | ADNI                                                                                       |
| Diana                             | Truran Sacrey |                       |                  |             |                                          |                                                         | ADNI                                                                                       |
| Juliet                            | Fockler       |                       |                  |             |                                          |                                                         | ADNI                                                                                       |
| Cat                               | Conti         |                       |                  |             |                                          |                                                         | ADNI                                                                                       |
| Dallas                            | Veitch        |                       |                  |             |                                          |                                                         | ADNI                                                                                       |
| John                              | Neuhaus       |                       |                  |             |                                          |                                                         | ADNI                                                                                       |
| Chengshi                          | Jin           |                       |                  |             |                                          |                                                         | ADNI                                                                                       |
| Rachel                            | Nosheny       |                       |                  |             |                                          |                                                         | ADNI                                                                                       |
| Miriam                            | Ashford       |                       |                  |             |                                          |                                                         | ADNI                                                                                       |
| Derek                             | Flenniken     |                       |                  |             |                                          |                                                         | ADNI                                                                                       |
| Adrieene                          | Kormos        |                       |                  |             |                                          |                                                         | ADNI                                                                                       |
| Tom                               | Montine       |                       |                  |             |                                          |                                                         | ADNI                                                                                       |
| Micheal                           | Rafii         |                       |                  |             |                                          |                                                         | ADNI                                                                                       |
| Rema                              | Raman         |                       |                  |             |                                          |                                                         | ADNI                                                                                       |

## Supplemental Online Content: Nonauthor Collaborators

\*First name, last name, and suffix (if applicable) are required and will appear in PubMed.

| *First Name and Middle Initial(s) | *Last Name       | *Suffix (eg, Jr, III) | Academic Degrees | Institution | Location (city, state/province, country) | Role or Contribution, eg, chair, principal investigator | Group (if more than 1 Group listed in the byline) and/or Subgroup (eg, Steering Committee) |
|-----------------------------------|------------------|-----------------------|------------------|-------------|------------------------------------------|---------------------------------------------------------|--------------------------------------------------------------------------------------------|
| Gustavo                           | Jimenez          |                       |                  |             |                                          |                                                         | ADNI                                                                                       |
| Micheael                          | Donohue          |                       |                  |             |                                          |                                                         | ADNI                                                                                       |
| Devon                             | Gessert          |                       |                  |             |                                          |                                                         | ADNI                                                                                       |
| Jennifer                          | Salazar          |                       |                  |             |                                          |                                                         | ADNI                                                                                       |
| Caileigh                          | Zimmerman        |                       |                  |             |                                          |                                                         | ADNI                                                                                       |
| Yuliana                           | Cabrera          |                       |                  |             |                                          |                                                         | ADNI                                                                                       |
| Sarah                             | Walter           |                       |                  |             |                                          |                                                         | ADNI                                                                                       |
| Garrett                           | Miller           |                       |                  |             |                                          |                                                         | ADNI                                                                                       |
| Godfrey                           | Coker            |                       |                  |             |                                          |                                                         | ADNI                                                                                       |
| Taylor                            | Clanton          |                       |                  |             |                                          |                                                         | ADNI                                                                                       |
| Lindsey                           | Hergesheimer     |                       |                  |             |                                          |                                                         | ADNI                                                                                       |
| Stephanie                         | Smith            |                       |                  |             |                                          |                                                         | ADNI                                                                                       |
| Olusegun                          | Adegoke          |                       |                  |             |                                          |                                                         | ADNI                                                                                       |
| Payam                             | Mahboubi         |                       |                  |             |                                          |                                                         | ADNI                                                                                       |
| Shelley                           | Moore            |                       |                  |             |                                          |                                                         | ADNI                                                                                       |
| Jeremy                            | Pizzola          |                       |                  |             |                                          |                                                         | ADNI                                                                                       |
| Elizabeth                         | Shaffer          |                       |                  |             |                                          |                                                         | ADNI                                                                                       |
| Danielle                          | Harvey           |                       |                  |             |                                          |                                                         | ADNI                                                                                       |
| Arivn                             | Forghanian-Arani |                       |                  |             |                                          |                                                         | ADNI                                                                                       |
| Bret                              | Borowski         |                       |                  |             |                                          |                                                         | ADNI                                                                                       |
| Chad                              | Ward             |                       |                  |             |                                          |                                                         | ADNI                                                                                       |
| Christopher                       | Schwarz          |                       |                  |             |                                          |                                                         | ADNI                                                                                       |
| David                             | Jones            |                       |                  |             |                                          |                                                         | ADNI                                                                                       |
| Jeff                              | Gunter           |                       |                  |             |                                          |                                                         | ADNI                                                                                       |
| Kejal                             | Kantarci         |                       |                  |             |                                          |                                                         | ADNI                                                                                       |
| Matthew                           | Senjen           |                       |                  |             |                                          |                                                         | ADNI                                                                                       |
| Prashanthi                        | Vermuri          |                       |                  |             |                                          |                                                         | ADNI                                                                                       |
| Robert C                          | Reid             |                       |                  |             |                                          |                                                         | ADNI                                                                                       |
| Nick C                            | Fox              |                       |                  |             |                                          |                                                         | ADNI                                                                                       |
| Ian                               | Malone           |                       |                  |             |                                          |                                                         | ADNI                                                                                       |
| Paul                              | Thompson         |                       |                  |             |                                          |                                                         | ADNI                                                                                       |

## Supplemental Online Content: Nonauthor Collaborators

\*First name, last name, and suffix (if applicable) are required and will appear in PubMed.

| *First Name and Middle Initial(s) | *Last Name      | *Suffix (eg, Jr, III) | Academic Degrees | Institution | Location (city, state/province, country) | Role or Contribution, eg, chair, principal investigator | Group (if more than 1 Group listed in the byline) and/or Subgroup (eg, Steering Committee) |
|-----------------------------------|-----------------|-----------------------|------------------|-------------|------------------------------------------|---------------------------------------------------------|--------------------------------------------------------------------------------------------|
| Sophia I                          | Tohomopoulous   |                       |                  |             |                                          |                                                         | ADNI                                                                                       |
| Talia M.                          | Nir             |                       |                  |             |                                          |                                                         | ADNI                                                                                       |
| Neda                              | Jahanshad       |                       |                  |             |                                          |                                                         | ADNI                                                                                       |
| Charles                           | DeCarli         |                       |                  |             |                                          |                                                         | ADNI                                                                                       |
| Alexander                         | Knaack          |                       |                  |             |                                          |                                                         | ADNI                                                                                       |
| Evan                              | Fletcher        |                       |                  |             |                                          |                                                         | ADNI                                                                                       |
| Duygu                             | Tosun-Turgut    |                       |                  |             |                                          |                                                         | ADNI                                                                                       |
| Stephanie                         | Rossi Chen      |                       |                  |             |                                          |                                                         | ADNI                                                                                       |
| Mark                              | Choe            |                       |                  |             |                                          |                                                         | ADNI                                                                                       |
| Karen                             | Crawford        |                       |                  |             |                                          |                                                         | ADNI                                                                                       |
| Paul A.                           | Yushkevich      |                       |                  |             |                                          |                                                         | ADNI                                                                                       |
| Sandhitsu                         | Das             |                       |                  |             |                                          |                                                         | ADNI                                                                                       |
| Robert A.                         | Koepp           |                       |                  |             |                                          |                                                         | ADNI                                                                                       |
| Eric M.                           | Reiman          |                       |                  |             |                                          |                                                         | ADNI                                                                                       |
| Kewei                             | Chen            |                       |                  |             |                                          |                                                         | ADNI                                                                                       |
| Chet                              | Mathis          |                       |                  |             |                                          |                                                         | ADNI                                                                                       |
| Susan                             | Landau          |                       |                  |             |                                          |                                                         | ADNI                                                                                       |
| John C.                           | Morris          |                       |                  |             |                                          |                                                         | ADNI                                                                                       |
| Richard                           | Perrin          |                       |                  |             |                                          |                                                         | ADNI                                                                                       |
| Nigel J.                          | Cairns          |                       |                  |             |                                          |                                                         | ADNI                                                                                       |
| Erin                              | Householder     |                       |                  |             |                                          |                                                         | ADNI                                                                                       |
| Erin                              | Franklin        |                       |                  |             |                                          |                                                         | ADNI                                                                                       |
| Haley                             | Bernhardt       |                       |                  |             |                                          |                                                         | ADNI                                                                                       |
| Lisa                              | Taylor-Reinwald |                       |                  |             |                                          |                                                         | ADNI                                                                                       |
| Magdalena                         | Korecka         |                       |                  |             |                                          |                                                         | ADNI                                                                                       |
| Michal                            | Figurski        |                       |                  |             |                                          |                                                         | ADNI                                                                                       |
| Scott                             | Neu             |                       |                  |             |                                          |                                                         | ADNI                                                                                       |
| Kwangski                          | Nho             |                       |                  |             |                                          |                                                         | ADNI                                                                                       |
| Shannon                           | Risacher        |                       |                  |             |                                          |                                                         | ADNI                                                                                       |
| Liana G                           | Apostolova      |                       |                  |             |                                          |                                                         | ADNI                                                                                       |
| Li                                | Shen            |                       |                  |             |                                          |                                                         | ADNI                                                                                       |



## Supplemental Online Content: Nonauthor Collaborators

\*First name, last name, and suffix (if applicable) are required and will appear in PubMed.

| *First Name and Middle Initial(s) | *Last Name       | *Suffix (eg, Jr, III) | Academic Degrees | Institution | Location (city, state/province, country) | Role or Contribution, eg, chair, principal investigator | Group (if more than 1 Group listed in the byline) and/or Subgroup (eg, Steering Committee) |
|-----------------------------------|------------------|-----------------------|------------------|-------------|------------------------------------------|---------------------------------------------------------|--------------------------------------------------------------------------------------------|
| Tatiana M                         | Foroud           |                       |                  |             |                                          |                                                         | ADNI                                                                                       |
| Kelly                             | Nudelman         |                       |                  |             |                                          |                                                         | ADNI                                                                                       |
| Kelley                            | Faber            |                       |                  |             |                                          |                                                         | ADNI                                                                                       |
| Kristi                            | Wilmes           |                       |                  |             |                                          |                                                         | ADNI                                                                                       |
| Leon                              | Thal             |                       |                  |             |                                          |                                                         | ADNI                                                                                       |
| Reisa                             | Sperling         |                       |                  |             |                                          |                                                         | HABS                                                                                       |
| Keith                             | Johnson          |                       |                  |             |                                          |                                                         | HABS                                                                                       |
| Dorene                            | Rentz            |                       |                  |             |                                          |                                                         | HABS                                                                                       |
| Rebecca E.                        | Amariglio        |                       |                  |             |                                          |                                                         | HABS                                                                                       |
| Deborah                           | Blacker          |                       |                  |             |                                          |                                                         | HABS                                                                                       |
| Rachel                            | Buckley          |                       |                  |             |                                          |                                                         | HABS                                                                                       |
| Jasmeer P.                        | Chhatwal         |                       |                  |             |                                          |                                                         | HABS                                                                                       |
| Brad                              | Dickerson        |                       |                  |             |                                          |                                                         | HABS                                                                                       |
| Nancy                             | Donovan          |                       |                  |             |                                          |                                                         | HABS                                                                                       |
| Michelle                          | Farrell          |                       |                  |             |                                          |                                                         | HABS                                                                                       |
| Geoffroy                          | Gagliardi        |                       |                  |             |                                          |                                                         | HABS                                                                                       |
| Jennifer                          | Gatchel          |                       |                  |             |                                          |                                                         | HABS                                                                                       |
| Edmarie                           | Guzman-Velez     |                       |                  |             |                                          |                                                         | HABS                                                                                       |
| Heidi                             | Jacobs           |                       |                  |             |                                          |                                                         | HABS                                                                                       |
| Roos                              | Jutten           |                       |                  |             |                                          |                                                         | HABS                                                                                       |
| Cristina                          | Lois Gomez       |                       |                  |             |                                          |                                                         | HABS                                                                                       |
| Gad                               | Marshall         |                       |                  |             |                                          |                                                         | HABS                                                                                       |
| Kate                              | Oaoo             |                       |                  |             |                                          |                                                         | HABS                                                                                       |
| Enmanuelle                        | Pardilla-Delgado |                       |                  |             |                                          |                                                         | HABS                                                                                       |
| Julie                             | Price            |                       |                  |             |                                          |                                                         | HABS                                                                                       |
| Prokopis                          | Prokopiou        |                       |                  |             |                                          |                                                         | HABS                                                                                       |
| Yakeel                            | Quiroz           |                       |                  |             |                                          |                                                         | HABS                                                                                       |
| Gretchen                          | Reynolds         |                       |                  |             |                                          |                                                         | HABS                                                                                       |
| Aaron                             | Schultz          |                       |                  |             |                                          |                                                         | HABS                                                                                       |
| Stephanie                         | Schultz          |                       |                  |             |                                          |                                                         | HABS                                                                                       |
| Jorge                             | Sepulcre         |                       |                  |             |                                          |                                                         | HABS                                                                                       |

Supplemental Online Content: Nonauthor Collaborators

\*First name, last name, and suffix (if applicable) are required and will appear in PubMed.

| <b>*First Name and Middle Initial(s)</b> | <b>*Last Name</b> | <b>*Suffix (eg, Jr, III)</b> | Academic Degrees | Institution | Location (city, state/province, country) | Role or Contribution, eg, chair, principal investigator | Group (if more than 1 Group listed in the byline) and/or Subgroup (eg, Steering Committee) |
|------------------------------------------|-------------------|------------------------------|------------------|-------------|------------------------------------------|---------------------------------------------------------|--------------------------------------------------------------------------------------------|
| Irina                                    | Skylar-Scott      |                              |                  |             |                                          |                                                         | HABS                                                                                       |
| Patrizia                                 | Vannini           |                              |                  |             |                                          |                                                         | HABS                                                                                       |
| Clara                                    | Vila-Castelar     |                              |                  |             |                                          |                                                         | HABS                                                                                       |
| Hyun-Sik                                 | Yang              |                              |                  |             |                                          |                                                         | HABS                                                                                       |
